# Supplementary material for: A novel protein encoded by a circular RNA circPPP1R12A promotes tumor pathogenesis and metastasis of colon cancer via Hippo-YAP signaling
Source: Mol Cancer. 2019 Mar 29;18:47. doi: 10.1186/s12943-019-1010-6 (PMC6440158; doi:10.1186/s12943-019-1010-6)
Supplement: Supplementary file 1 — Table S1. Detailed information of the differentially expressed circRNAs. (XLS 66 kb) [file 12943_2019_1010_MOESM1_ESM.xls]

## Sheet: Detailed information 
probeID	P-value	FDR	FC (abs)	Regulation (T vs N)	circRNAs	circRNA_type	chrom	strand	txStart	txEnd	best_transcript	GeneSymbol	Sequence
ASCRP000314	0.035817	0.240141	6.17969	up	hsa_circ_0000423	exonic	chr12	-	80180153	80183460	ENST00000550903	PPP1R12A	AAAGGCCACCCAGCCCTGTAAGACCAGTAATAAATTTCTGTCTACT
ASCRP000017	0.0464165	0.254619	4.64592	up	hsa_circ_0000512	intragenic	chr14	-	20811282	20811436	NR_002312	RPPH1	CGAAGTGAGTTCAATGGCTGAGGTGAGGTGAGTTCCCAGAGAACGG
ASCRP000385	0.0217444	0.220431	4.38521	up	hsa_circ_0000511	intragenic	chr14	-	20811282	20811431	NR_002312	RPPH1	AGTGAGTTCAATGGCTGAGGTGAGTTCCCAGAGAACGGGGCTCCGC
ASCRP000071	0.012058	0.187372	4.03493	up	hsa_circ_0000515	intragenic	chr14	-	20811305	20811534	NR_002312	RPPH1	AACAGACTCACGGCCAGCGAACTGAGTGCGTCCTGTCACTCCACTC
ASCRP001594	0.0450341	0.25213	3.93668	up	hsa_circ_0000467	exonic	chr13	-	21742126	21742538	uc001unt.3	SKA3	ATAATAAAAGTACACGAGCAAGAAGCCATTAACTCTGACCCAGAGT
ASCRP003323	0.0138273	0.192885	3.79063	up	hsa_circ_0001136	exonic	chr20	+	30954186	30956926	uc002wxs.3	ASXL1	TTCACGCTCAAGGTATTAGAAAACTACTCGGATGCTCCAATGACAC
ASCRP000018	0.000178442	0.08071	3.61212	up	hsa_circ_0000518	intragenic	chr14	-	20811404	20811554	NR_002312	RPPH1	TCCGCGCGAGCTCATCAGTGGGGCCACGAGCTGAGTGCGTCCTGTC
ASCRP000961	0.0472522	0.25498	3.34003	up	hsa_circ_0000231	exonic	chr10	-	32197099	32199491	uc001ivz.1	ARHGAP12	ACAGATAAGGGTTTAAATGTGATACTGGTGTAGATCTCCTTGTTCT
ASCRP002721	0.0342638	0.239483	3.29825	up	hsa_circ_0048232	exonic	chr19	+	1417498	1422395	uc002lsm.3	DAZAP1	TGATCTATGACGCCGAGAAGCAGAGGCCCCGAGGAAGCTCTTCGTG
ASCRP002541	0.0397586	0.24307	3.26929	up	hsa_circ_0045932	exonic	chr17	-	76823326	76825089	uc002jvz.1	USP36	GCTGTGCCAAGCCACCAGGGAAGCTTCTGCATGCTGTGTGTCATGC
ASCRP000390	0.000403874	0.08071	2.96401	up	hsa_circ_0000519	intragenic	chr14	-	20811436	20811534	NR_002312	RPPH1	CTTCGGGGAGCTGAGTGCGTCCTGTCACTCCACTCCCATGTCCCTT
ASCRP002566	0.0366351	0.242661	2.68454	up	hsa_circ_0000816	exonic	chr17	+	80521229	80526077	uc002kfm.1	FOXK2	AAGGAAGCTTCAGGTGGAGACAGCCCGAAGGTGCACATTCAGGTTC
ASCRP000315	0.00263499	0.119582	2.66619	up	hsa_circ_0000517	intragenic	chr14	-	20811404	20811492	NR_002312	RPPH1	TCCGCGCGAGGTCTGAGACTAGGGCCAGAGGCGGCCCTAACAGGGC
ASCRP000531	0.0165931	0.20279	2.6208	up	hsa_circ_0007364	exonic	chr1	-	32381495	32385259	uc001btx.2	PTP4A2	TCCACGTTCTAGTTTTTCGTTGGAATATACGTTGCACATTTATGGC
ASCRP004691	0.0325229	0.236871	2.60363	up	hsa_circ_0001727	exonic	chr7	+	99621041	99621930	uc003usk.1	ZKSCAN1	CAGTCACGAGGAATAGTAAAGAAACACATCATAAAACCTCCCAGGA
ASCRP004326	0.0237039	0.224831	2.55549	up	hsa_circ_0008285	exonic	chr6	+	4891946	4892613	uc003mwi.3	CDYL	CTTAGCTGTTAACGGGAAAGGTTGAAAGGATTGTTGACAAAAGGAA
ASCRP002568	0.04139	0.245492	2.54099	up	hsa_circ_0046430	exonic	chr17	+	80521229	80545148	uc002kfm.1	FOXK2	GTGAACAATGGTGCACATTCAGGTTCCCGAGCACAAACATCAAGAT
ASCRP000343	0.00740947	0.159242	2.52105	up	hsa_circ_0000520	intragenic	chr14	-	20811436	20811559	NR_002312	RPPH1	CTCCCTGAGCTTCGGGGAGGGAAGCTCATCAGTGGGGCCACGAGCT
ASCRP002179	0.0365408	0.242661	2.51374	up	hsa_circ_0005615	exonic	chr16	+	68155889	68157024	uc010vkq.2	NFATC3	ACCCCTATATTTCGATCTTGAGCCAGATGATTGTGCATCCATTTAC
ASCRP003486	0.00183079	0.100449	2.50384	up	hsa_circ_0062682	exonic	chr22	-	26936754	26937684	uc003acw.3	TPST2	TCATTGGCAAGCCCGGTGGTGTCTCCCTGTCCAAATGTGAGCCTGG
ASCRP000391	0.0394466	0.24307	2.42497	up	hsa_circ_0009189	exonic	chr1	+	871151	874792	uc001abx.1	SAMD11	CCCAGCCACGCCAGGACGGCAACCTTCCCACCCTCATATCCAGCGT
ASCRP003797	0.0313626	0.234445	2.42022	up	hsa_circ_0001355	exonic	chr3	+	157839891	157841780	uc003fbt.3	RSRC1	CAAAAAGCAGAACAAGAAGAAATGGGACGTCGGTCATCAGATACTG
ASCRP000055	0.0123645	0.187372	2.40276	up	hsa_circ_0001829	exonic	chr8	-	142264087	142264728	NM_001286646	SLC45A4	AATACTGTTGCAGATTGATCATCCAGTCACTCGATGGGGATTACCA
ASCRP004099	0.0467458	0.254619	2.39014	up	hsa_circ_0072088	exonic	chr5	-	32379220	32388780	uc011cny.1	ZFR	TCCAAGCTGGCCCTTACGTCGTCCTGACTCATCTGATGACCGTTAT
ASCRP001624	0.0374073	0.24307	2.35414	up	hsa_circ_0002215	exonic	chr13	+	47297355	47308133	uc001vbj.3	LRCH1	AGTACCAGAGTGTTTCTAAGACCTCAGAGAAATTTGGAATCTATAG
ASCRP003439	0.00496569	0.142774	2.33916	up	hsa_circ_0061776	exonic	chr21	+	42609439	42629253	uc002yyw.3	BACE2	CCCTGTGCAGGTCTAGCACATACCGCTCCAAGGGCTTTGACGTCAC
ASCRP002243	0.00656146	0.153194	2.33041	up	hsa_circ_0000725	exonic	chr16	+	88008653	88052273	uc002fkp.3	BANP	GGCATCCGGTGTGACCAAAAGCCAGCCCCACTGTGAGTTGAACTCT
ASCRP003961	0.041343	0.245492	2.31427	up	hsa_circ_0070039	exonic	chr4	-	77055327	77065626	uc003hjs.3	NUP54	AAACATTGCCAGATGATCAGTGGGTTTGGAGGATTTGGGACAACAT
ASCRP004231	0.0188221	0.210756	2.31055	up	hsa_circ_0001535	exonic	chr5	-	137320945	137324004	uc003lbz.2	FAM13B	TGAGAATGAAGAAAATACCCAGCACCCATATATCTCCCATCAGCAT
ASCRP001795	0.0415367	0.245492	2.20133	up	hsa_circ_0000567	exonic	chr14	-	99924615	99932150	uc021sbn.1	SETD3	AGTCATCCAGTCAGAAAAATGGGTAAGAAGAGTCGAGTAAAAACTC
ASCRP001049	0.0226578	0.222655	2.13877	up	hsa_circ_0003839	exonic	chr10	+	104119940	104120152	uc001kux.2	GBF1	ACTTATTCCAGGCACAGCTTTGGTCCCCTATGGTCTTCCCTGCATC
ASCRP001207	0.0439983	0.248377	2.1238	up	hsa_circ_0022383	exonic	chr11	+	61605249	61615756	uc001nsj.2	FADS2	ACGTGTTTGTTCTGGGCGAATGGCAGCCCATCGAGGATGCCTTCCG
ASCRP001596	0.0436399	0.247373	2.12186	up	hsa_circ_0008784	exonic	chr13	+	24164288	24200931	uc001uot.3	TNFRSF19	CCTTACGAACCGCACTAACTCTCCAACAATAAATACATTTGATAAG
ASCRP003410	0.0339854	0.238042	2.12113	up	hsa_circ_0007609	exonic	chr20	+	62559687	62562375	uc002yhh.3	DNAJC5	TGACGAGAGGGAATAGCCTAACATGGCAGACCAGAGACAGCGCTCA
ASCRP002242	0.00362251	0.132518	2.10157	up	hsa_circ_0040809	exonic	chr16	+	88008653	88017865	uc002fkp.3	BANP	ACGTGCAACAAAGTGCGATGGTGACCAAAAGCCAGCCCCACTGTGA
ASCRP002245	0.025261	0.227303	2.06806	up	hsa_circ_0040823	exonic	chr16	+	88061088	88071617	uc002fkp.3	BANP	AGGACGGTCAGGTCACCTTTTCTATAAATTTGGCATCACAGAATCC
ASCRP000958	0.000811736	0.08071	2.06208	up	hsa_circ_0007503	exonic	chr10	+	28872327	28884970	uc001iuh.3	WAC	GAAAGAAAAGGGACCAGTTACTCTCCACAAGAAAATTCACACAACC
ASCRP000797	0.0435154	0.247373	2.05884	up	hsa_circ_0007905	exonic	chr1	-	180953812	180962561	uc010pnr.2	STX6	ATGACCAGTGGACATGAAAGATCAGATGTCAACTTCATCTGTGCAG
ASCRP004426	0.0316949	0.234445	2.04243	up	hsa_circ_0004058	exonic	chr6	+	87925620	87928449	uc003pll.1	ZNF292	CCATTGGATAAGGATAAAGACACTCCTAGAATATGCAGAGAAATGG
ASCRP001564	0.046378	0.254619	2.01837	up	hsa_circ_0029325	exonic	chr12	-	125270902	125284788	uc001ugm.4	SCARB1	TCATCTGCCAAATCCGGAGCCAAGTGCCCCCTTGTTTCTCTCCCAT
ASCRP003637	0.00257373	0.119582	2.00041	up	hsa_circ_0005870	exonic	chr3	-	47079155	47088111	uc003cqr.3	SETD2	TGAAAACCCCATGAAGAGTTATGCCCAGCCAAGTCTTCAGTATATC
ASCRP002971	0.000964133	0.0835244	1.9892	up	hsa_circ_0007385	exonic	chr2	-	32142994	32157204	uc002rnz.3	MEMO1	TATACAGCTAAAGCCATGGAAAGCCATGCAGGATATACGTACTGTG
ASCRP000189	0.0497416	0.259628	1.9762	up	hsa_circ_0000554	intragenic	chr14	+	74551677	74551959	NM_001024674	LIN52	ATTCTGGGTAAAAGGACAGGGGGATGGCGTCTCCCACAGACGGTAA
ASCRP004667	0.00244973	0.11932	1.97202	up	hsa_circ_0006098	exonic	chr7	-	75103969	75104454	uc003udk.4	POM121C	ATTTCCATGTCAACATAGTCCTGGGGCCAGTGTCATTCAAAGATGT
ASCRP004182	0.0436584	0.247373	1.95885	up	hsa_circ_0006916	exonic	chr5	-	78734832	78752841	uc003kfy.3	HOMER1	TTTCACATAGGGAACAACCTATCTTCAGCACTCGAGCTCATGTCTT
ASCRP003791	0.0368795	0.24307	1.93715	up	hsa_circ_0006801	exonic	chr3	+	149613259	149639014	uc003exn.4	RNF13	TTCAAGAAAGGTTTTAAATGCACAGAGAGCAGGATACAAGGCAGCC
ASCRP001293	0.01036	0.185354	1.93692	up	hsa_circ_0023919	exonic	chr11	-	85707868	85714494	uc001pbo.1	PICALM	GTAGCAAGTACATGGGGAGGCCCCTAGCAGTCTTCTTGATGCTTTG
ASCRP003049	0.0381735	0.24307	1.92802	up	hsa_circ_0001017	exonic	chr2	-	61749745	61761038	uc002sbj.3	XPO1	CAGTGCGAAGTAATCTATGCCAGCAATTATGACAATGTTAGCAGAC
ASCRP003438	0.0397978	0.24307	1.92785	up	hsa_circ_0061774	exonic	chr21	+	42598192	42629253	uc002yyw.3	BACE2	CCCTGTGCAGCTACAGATTCTCGTTGACACTGGAAGCAGTAACTTT
ASCRP003402	0.0204591	0.217262	1.89981	up	hsa_circ_0003231	exonic	chr20	+	60737807	60738678	uc002ybz.1	SS18L1	TCCCAGCAAGGGCCGAGCCACGTGTCCATGCAGCAGACGGCGCCTA
ASCRP001329	0.0472954	0.25498	1.89106	up	hsa_circ_0007827	exonic	chr11	+	117023156	117034608	uc009yzm.3	PAFAH1B2	ATCATTGTATTGGTGTAGAATGAGCCAAGGAGACTCAAACCCAGCA
ASCRP004471	0.0305738	0.233379	1.88583	up	hsa_circ_0006554	exonic	chr6	-	137015277	137018525	uc010kgw.1	MAP3K5	ATGGAGCTTCTTGCCAGTACTTCCGGGAATCTATACTCAATGACAT
ASCRP003753	0.0356322	0.240141	1.85875	up	hsa_circ_0001333	exonic	chr3	-	125032151	125050082	uc003ehx.4	ZNF148	TTAATGTCCCTGATAGAGGGAGGAATCAGCAGCTTGGAAATTCAAG
ASCRP001495	0.00339994	0.132094	1.85379	up	hsa_circ_0000437	exonic	chr12	-	109046047	109048186	uc001tnj.3	CORO1C	AGATTGCCAGAAAAATATGCAGGAACCAATTGCTCTTCATGAGATG
ASCRP002022	0.0190493	0.21248	1.82928	up	hsa_circ_0000665	exonic	chr16	+	1364020	1370518	uc002clc.2	UBE2I	CGATTTACTGGGACTTTGAACATGTCGGGGATCGCCCTCAGCAGAC
ASCRP001923	0.0467821	0.254619	1.82786	up	hsa_circ_0000620	exonic	chr15	-	67524151	67529158	uc002aqk.4	AAGAB	GTGATGAAGAATGATATCCTTGGAACAGAAGATCTTATTGTGGAAG
ASCRP001342	0.00246469	0.11932	1.82287	up	hsa_circ_0024604	exonic	chr11	+	120276826	120278532	uc021qrm.1	ARHGEF12	TCACATGATTTTGACCCCACAGGTTTCCCCTCAAAAAACCTATAAG
ASCRP000259	0.0377147	0.24307	1.80357	up	hsa_circ_0000516	antisense	chr14	+	20811398	20811483	NR_002312	RPPH1	TCTGGCCCTATCTGACCTCGCGCGGAGCCCCGTTCTCTGGGAACTC
ASCRP000372	0.03576	0.240141	1.77941	up	hsa_circ_0000228	exonic	chr10	+	31661946	31676195	ENST00000437844	ZEB1	GCCACCTTGTTCTCTAAAGTTTTCAGTTTAAATTCTCAACTGGCAA
ASCRP003048	0.0428032	0.247075	1.76991	up	hsa_circ_0001016	exonic	chr2	-	61749745	61753656	uc002sbj.3	XPO1	CAGTGCGAAGCAAAGAATGGCTCAAGAAGTACTGACACATTTAAAG
ASCRP001283	0.0115983	0.187016	1.75181	up	hsa_circ_0002998	exonic	chr11	-	85685750	85714494	uc001pbo.1	PICALM	CCCTGTATCAGGAGCACAGGCCCCTAGCAGTCTTCTTGATGCTTTG
ASCRP004507	0.0083651	0.167914	1.75079	up	hsa_circ_0001654	exonic	chr6	+	155095122	155116273	uc010kji.3	SCAF8	CAAGGCCAGCAGTTGTATTCCCTGAATGACTATAAACCACCCATTT
ASCRP003959	0.0316614	0.234445	1.74984	up	hsa_circ_0070033	exonic	chr4	-	77045801	77065626	uc003hjs.3	NUP54	CATAGAACTTTACAGGTGGGTTTGGAGGATTTGGGACAACATCTAC
ASCRP000994	0.0228677	0.222777	1.73655	up	hsa_circ_0006276	exonic	chr10	-	75156276	75160615	uc009xre.3	ANXA7	TTACCCTAGTCAGAATGTCATACCCAGGCTATCCCCCAACAGGCTA
ASCRP001453	0.0425828	0.247075	1.72947	up	hsa_circ_0027089	exonic	chr12	-	57059987	57064148	uc001slu.4	PTGES3	GAGCAGATGATCTTAATTGGCTTAGTGTCGACTTCAATAATTGGAA
ASCRP004673	0.0214784	0.220431	1.72148	up	hsa_circ_0008139	exonic	chr7	+	77210743	77212967	uc003ugh.2	PTPN12	GGGAGTATAATGTTGTGTTGATCACAGCCGAGTTAAATTGACATTA
ASCRP001841	0.0121939	0.187372	1.70518	up	hsa_circ_0000592	exonic	chr15	+	41988272	41991357	uc001zog.1	MGA	CCTGGTCTTCAAGAAGTCTTATTGCCAGCAGTTTTGAAGATGACTC
ASCRP001971	0.0366118	0.242661	1.69583	up	hsa_circ_0003893	exonic	chr15	+	81229014	81230320	uc002bfw.1	KIAA1199	AGGACTCAGGATGTACATTCAAGCCTACAAGACCAGTAACCTGCGA
ASCRP000487	0.00856275	0.17084	1.6951	up	hsa_circ_0009061	exonic	chr1	+	23356961	23377013	uc001bgi.2	KDM1A	ATTAGAAACCGCACAGTAGAGTACAGAGAGATGGATGAAAGCTTGG
ASCRP002123	0.0171889	0.205766	1.69309	up	hsa_circ_0038718	exonic	chr16	+	27351506	27353580	uc002dom.3	IL4R	TTTTCTGCTCTCCGAGTGCCTTGGCATCTCCCAATGGGGTGGCTTT
ASCRP004065	0.0396374	0.24307	1.67815	up	hsa_circ_0005066	exonic	chr4	+	186180001	186188309	uc003ixh.3	SNX25	AGCAACTAAGTGTTCGACTACAGTTATAGAGATTACATTCTGTCCT
ASCRP004524	0.00220017	0.114968	1.67798	up	hsa_circ_0003345	exonic	chr6	+	159004985	159006457	uc003qri.1	TMEM181	ATGTGCAGGGCTAAAGCCAATTCAAATACTTTCAAATCCACTGTCT
ASCRP000990	0.0481806	0.257485	1.67656	up	hsa_circ_0018659	exonic	chr10	+	72285678	72291210	uc001jrd.4	KIAA1274	CCGGAAAGAGGTCTGGGGTCCTGAGGCTGCTGGCAGACTATGGGTA
ASCRP004055	0.0498078	0.259628	1.67315	up	hsa_circ_0071375	exonic	chr4	+	166141085	166184511	uc003irb.3	KLHL2	ACCTATGCAGATGCACAAAGCAGGGTCATCAGAAGCCTCTCGATTC
ASCRP003082	0.033923	0.238042	1.66984	up	hsa_circ_0055377	exonic	chr2	+	80772106	80783018	uc010yse.2	CTNNA2	TCTGAAACAGGTTGCCAATTTGGCCTGTTCCATCTCCAACAATGAA
ASCRP004547	0.0316813	0.234445	1.66638	up	hsa_circ_0008039	exonic	chr7	-	716865	751164	uc003siu.2	PRKAR1B	ACCTGGATGACAACGAGAGGAGGAAGGAAGCAGCCACCCTCGCCAT
ASCRP000874	0.0427966	0.247075	1.66633	up	hsa_circ_0003314	exonic	chr1	-	233353644	233363117	uc001hvl.2	PCNXL2	ACCAATACACCATGTGAGTCAGGATCTGGAAGCCTCGTCATGTTCT
ASCRP003769	0.0449106	0.251866	1.66058	up	hsa_circ_0067322	exonic	chr3	-	129546645	129547351	uc021xdy.1	TMCC1	TGCGGAGCGGATAGGCATGAAGCCTTCGTCTCACAGCTGCATGCGT
ASCRP001173	0.0380531	0.24307	1.65728	up	hsa_circ_0006988	exonic	chr11	+	36248634	36248980	uc010rez.1	LDLRAD3	TGGACCAGAGAACCCGGCAGTGGGCAGGTGTTTGTGACTTCAGAGA
ASCRP000428	0.0232612	0.222777	1.65695	up	hsa_circ_0008501	exonic	chr1	-	8601272	8674745	uc001ape.3	RERE	TCTACATATTAGGATATAACCCTGAGACAAGGTCCACAACTCCCAG
ASCRP001856	0.0268186	0.227303	1.65562	up	hsa_circ_0002891	exonic	chr15	+	44048846	44055404	uc010ued.2	PDIA3	ATAATGGAGAGTTGATTGCACTGCCAACACTAACACCTGTAATAAA
ASCRP001136	0.0317768	0.234445	1.65529	up	hsa_circ_0000277	exonic	chr11	+	14793482	14810788	uc001mln.3	PDE3B	GGCATTTCAAGATGATTCTTTGGGATTGGGACTTAAAACAATGGTA
ASCRP001708	0.0394321	0.24307	1.64939	up	hsa_circ_0004904	exonic	chr14	-	50136241	50141145	uc001wwu.3	POLE2	AAGCAAATTCCAGAGAGCACGTTTTCAATATCATAGGAGCATTTGA
ASCRP000488	0.00341069	0.132094	1.64351	up	hsa_circ_0007822	exonic	chr1	+	23356961	23385660	uc001bgi.2	KDM1A	TTATGAAGCCAACGGACAAGCTGTAGAGTACAGAGAGATGGATGAA
ASCRP004596	0.0491895	0.258983	1.64169	up	hsa_circ_0001685	exonic	chr7	+	24663284	24690331	uc003swx.3	MPP6	TACCATTACTCCTCAACAGCAATGCAGCAAGTCTTGGAAAACCTTA
ASCRP003802	0.0277264	0.228774	1.63843	up	hsa_circ_0001359	exonic	chr3	-	169854206	169867032	uc003fgl.2	PHC3	GTATTCACCAGTTAATAGCACCAGATCAACCTCTCCACTTCTCCTA
ASCRP003541	0.0286564	0.228774	1.6293	up	hsa_circ_0001238	exonic	chr22	+	42204878	42206295	uc003bbh.1	CCDC134	AAGCTGAAGGATGCTCAAGAGGTTTGGATATGGACCTTCTTCAATT
ASCRP004593	0.0124649	0.187372	1.62288	up	hsa_circ_0001684	exonic	chr7	+	23650789	23651172	uc003swl.3	CCDC126	GCAGGATATGAGTTAATAGAGTGGATACAACCTTGCTGAAGATGAA
ASCRP004584	0.0261327	0.227303	1.61724	up	hsa_circ_0005519	exonic	chr7	-	17908029	17915413	uc003stv.3	SNX13	CAGTATGTCATATGGATGGTCAAAAGAAATAGACTGGCAACCTTAT
ASCRP003108	0.0277531	0.228774	1.61006	up	hsa_circ_0002076	exonic	chr2	-	110321942	110350696	uc002tew.3	SEPT10	AGAAAACAAGCCAGTCAGCTCTTTCAGTCTCACATGGCAACGAAAA
ASCRP004654	0.00162923	0.0950997	1.60443	up	hsa_circ_0005588	exonic	chr7	+	73100965	73101425	uc003tyt.3	WBSCR22	ACATTTGATGGTTGCATCAGCTCACGGATGATTGATATCCAGACCA
ASCRP004499	0.00346217	0.132304	1.60099	up	hsa_circ_0078297	exonic	chr6	+	151336015	151336829	uc003qoc.3	MTHFD1L	AAAGAAGCCGATTCCAGTTCCTGTATGATGTTCAGAACATCCAGCT
ASCRP001829	0.0493263	0.258983	1.58882	up	hsa_circ_0008946	exonic	chr15	+	40477365	40477843	uc010ucl.1	BUB1B	AGCCAGTTATCTCCAAGCCAGAACAGAGGACTCCAAAATCCATTTC
ASCRP001707	0.0395397	0.24307	1.58499	up	hsa_circ_0031787	exonic	chr14	-	50131343	50141145	uc001wwu.3	POLE2	GTCTTAGCAGAAGAGAGCACGTTTTCAATATCATAGGAGCATTTGA
ASCRP004634	8.5413e-05	0.08071	1.58359	up	hsa_circ_0008334	exonic	chr7	-	50737418	50742355	uc010kzb.2	GRB10	CGCAAAGCAGAGGATGATGTGGACCTGGAAGCCCTGGTGAACGATA
ASCRP002191	0.00862483	0.171042	1.57864	up	hsa_circ_0008700	exonic	chr16	+	69170598	69177292	uc010cfi.3	CIRH1A	TGTAGCTGACTTTTTCCCAGGTCATGAGTCTCGGGCTACAGAAGCT
ASCRP003789	0.0270421	0.227303	1.57671	up	hsa_circ_0003502	exonic	chr3	+	149563797	149629870	uc003exn.4	RNF13	ATAGTCATTTTCATGGTGATTTTACAACGAGATGCTGCTCTCCATA
ASCRP003788	0.0248505	0.227303	1.57493	up	hsa_circ_0004565	exonic	chr3	+	149563797	149619949	uc003exn.4	RNF13	CACATATGAAAAAGGGTGATTTTACAACGAGATGCTGCTCTCCATA
ASCRP000869	0.0112966	0.185651	1.57474	up	hsa_circ_0001958	exonic	chr1	-	233313547	233344435	uc001hvp.1	PCNXL2	GAAAGATTCAGTGGGACACAACCAAATCATAACATATAGCAGACCA
ASCRP003347	0.0165563	0.20279	1.56333	up	hsa_circ_0005587	exonic	chr20	-	34243123	34246936	uc002xdn.1	CPNE1	GGTGAACTGGTCTAAAAGTTGGTTTTAATTGGTTGCCCACAGGATT
ASCRP003790	0.0379012	0.24307	1.55288	up	hsa_circ_0001346	exonic	chr3	+	149563797	149639014	uc003exn.4	RNF13	TACATAAATTCAAGAAAGGTGATTTTACAACGAGATGCTGCTCTCC
ASCRP003184	0.0265653	0.227303	1.55041	up	hsa_circ_0002024	exonic	chr2	+	191523883	191537878	uc002usb.3	NAB1	AAGAGAATTAAAGTGGAGGTTAAACCCATCCAGAGTAATGGCTGCG
ASCRP003412	0.0224898	0.221666	1.54884	up	hsa_circ_0061265	exonic	chr21	+	15456270	15456465	uc002yjk.3	BC048201	GAGAGAGGAGAAATCCCAAGTTGACCGTCAAGTCCAACGCTCGCTG
ASCRP004702	0.0352507	0.240141	1.53317	up	hsa_circ_0007520	exonic	chr7	+	102398300	102401858	uc022ajo.1	FAM185A	AGTGTTCATGGGTCAAAAATTGCATGTTCAAACAAAAGGAGGCAAA
ASCRP002900	0.0118416	0.187372	1.52582	up	hsa_circ_0051732	exonic	chr19	-	48660270	48660397	uc002phz.1	LIG1	CGTCGCACAGAAGCCTGCCCTGGACTGCTCACAGGTCTCCCCGCCC
ASCRP004067	0.000523541	0.08071	1.52402	up	hsa_circ_0001461	exonic	chr4	-	187627716	187630999	uc003izf.3	FAT1	TCAAAATAGGTGAAGAGACAGATTCCCGACAGTTAAGCAATGGGGA
ASCRP004260	0.0181149	0.208511	1.52051	up	hsa_circ_0006528	exonic	chr5	-	145197456	145205763	uc003lno.1	PRELID2	ACCCAAATTGGTTTCCACGCTTTGAGAAGGACTGAATGAGATCATG
ASCRP003875	0.00143153	0.0950997	1.5183	up	hsa_circ_0068850	exonic	chr4	-	1696500	1698078	uc003gdl.1	SLBP	AGGATGACTTTACACCTTCGACAACCTGGCATTCATCCCAAGACCC
ASCRP002403	0.0135214	0.192885	1.50309	up	hsa_circ_0043557	exonic	chr17	-	38635925	38638668	uc010cxb.3	TNS4	TCCAGAGGAAGTGAGGACAGCAATGACCTCATCCGACACTTCCTCA
ASCRP003582	0.00937964	0.176541	1.50215	up	hsa_circ_0001268	exonic	chr3	+	10128817	10130634	uc003buw.3	FANCD2	CACTGACCAGCCAGAGCGTCCATTACTTGCAGAATTTCCATCAAAG
ASCRP000479	0.033211	0.237898	-1.53048	down	hsa_circ_0010501	exonic	chr1	-	21553651	21554534	uc001bei.2	ECE1	TTTGATGATCAAGGTGGAGCATGACCCCGCCCATGGTGAACGCCTA
ASCRP000411	0.00784474	0.165075	-1.53747	down	hsa_circ_0009456	exonic	chr1	-	5987708	6022009	uc001als.2	NPHP4	CACGTCCCCTTCGAAAAACAGACACATGACCCTCATTGAGAACTGC
ASCRP000480	0.0435176	0.247373	-1.56432	down	hsa_circ_0008563	exonic	chr1	-	21599191	21599404	uc001bei.2	ECE1	ATCAAGCACCTCCTCGGATCCCCCTCTGTGTGCCTGAGCGAAGCTT
ASCRP000230	0.0215371	0.220431	-1.58357	down	hsa_circ_0000238	intronic	chr10	+	53459000	53459207	NM_001098512	PRKG1	TCCGAGAAAATGCTCTTTAACTCCTCCTTATTCTTTTCACTGGCAG
ASCRP000507	0.0294612	0.229825	-1.63304	down	hsa_circ_0007895	exonic	chr1	-	28362054	28384605	uc010ofu.2	EYA3	CCTCCTTTTGATTGTGAAAACTGCTGAGAGAGACTTGCAATCCAGT
ASCRP000056	0.0265918	0.227303	-1.64774	down	hsa_circ_0001853	antisense	chr9	+	35657751	35658017	NR_003051	RMRP	CACGAACCACCCGCGCTGAGAATGAGCCCCGTGTGGTTGGTGCGCG
ASCRP000615	7.04756e-05	0.08071	-1.66906	down	hsa_circ_0004877	exonic	chr1	-	51871576	51874004	uc001csp.3	EPS15	AGGAATCTCCAATCTCTTCTCTGAAAGCTGAATTAACTAGTCAGGA
ASCRP000064	0.02706	0.227303	-1.69169	down	hsa_circ_0000376	intronic	chr12	-	11199618	11248400	uc001qzf.2	PRB4	ACTCCATCTATCCATATGAGAGTTGGATTCTCACTCTGTTGTCCAC
ASCRP000111	0.0058712	0.143954	-1.69764	down	hsa_circ_0001669	intragenic	chr7	-	1543324	1543723	NM_001080453	INTS1	CGGGACCCCGGCCCAAGCCCCGTGCGGCAAGGGAGCGAATGAGCGA
ASCRP000204	0.000301505	0.08071	-2.17497	down	hsa_circ_0001132	antisense	chr20	-	8352261	8352391	NM_015192	PLCB1	GCCCCTCTGTCCAAGAGCCCACATATTTGTTCATTTACTTTTTAAT
ASCRP000217	0.0173883	0.206489	-2.18696	down	hsa_circ_0001658	exonic	chr6	+	157357968	157406039	uc003qqq.1	ARID1B	TCTCTCCTGCAAGTATCCCAGGTTGAAGTCTTGGCCTCGGAGGATG
ASCRP000205	0.00586508	0.143954	-2.20282	down	hsa_circ_0001056	intragenic	chr2	-	100721965	100754399	NM_001025108	AFF3	CCCCTTCCCGCTGGGAGTGGAGTATGAAGACCAAGGAATTCTCTTA
ASCRP000085	0.00335243	0.132094	-2.68629	down	hsa_circ_0000775	intronic	chr17	-	43012303	43012398	NM_001264573	KIF18B	AGGCCTCTTCCTTTCTTCCTTTCTCAGATACATCCCGGCCTCAGCT
ASCRP000212	0.00437684	0.134659	-2.77229	down	hsa_circ_0001455	antisense	chr4	+	164514761	164515093	NM_001166373	MARCH1	GGTTTTATAAGCTCATCCTCAACCATGACTTCCTTCCAATTTTGTC
ASCRP000591	0.010434	0.185478	-3.2337	down	hsa_circ_0012185	exonic	chr1	-	45340349	45341367	uc001cmt.2	EIF2B3	TGGAGGAAGGGTGCCCAAATTGCTGTCTGCTCTCTGTCCAGAAGAA
ASCRP000408	0.000297986	0.08071	-9.55313	down	hsa_circ_0009361	exonic	chr1	-	1749275	1770677	uc001aif.3	GNB1	CAACTCTCTCTCAGACAAATTTACATGTATTGGAGACCAGACCAGA
